# Supplementary material for: An assay for chemical nociception in Drosophila larvae
Source: PubMed Central journal article supplement (PMC6790381; doi:10.1098/rstb.2019.0282), 2019-09-23

Figure S1

Chemical nociception at different stages of larval development

A

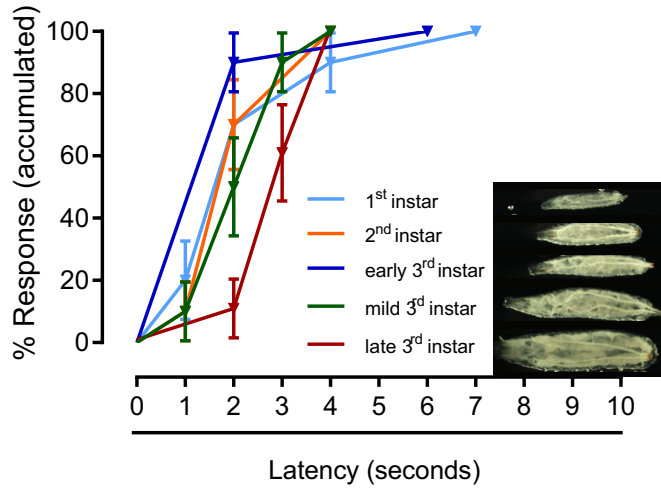

Supplement: rstb20190282supp1.pdf [file rstb20190282supp1.pdf]
