# Supplementary material for: An assay for chemical nociception in Drosophila larvae
Source: PubMed Central journal article supplement (PMC6790381; doi:10.1098/rstb.2019.0282), 2019-09-23

# Figure S5

## Chemical nociceptive sensitization after tissue damage

**A****UV irradiation**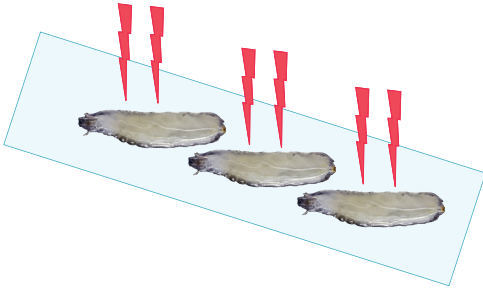**B**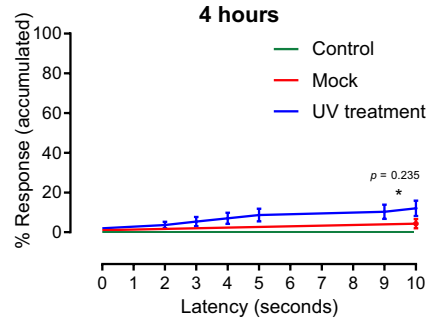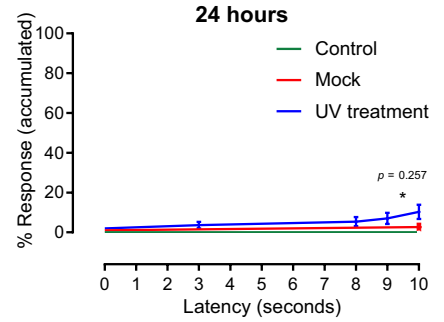**C****Pinch wounding**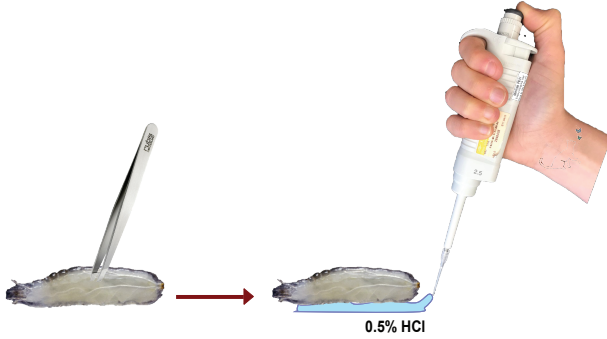**D****Baseline**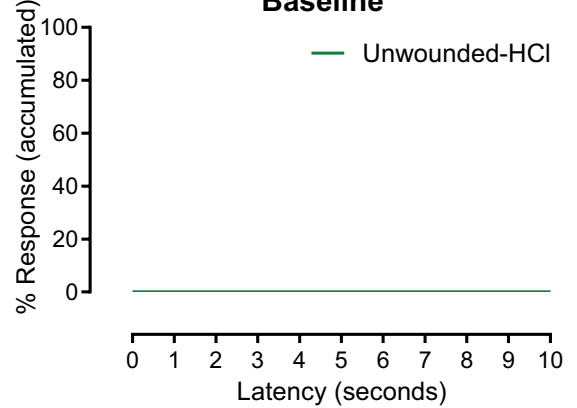**E****4 hours**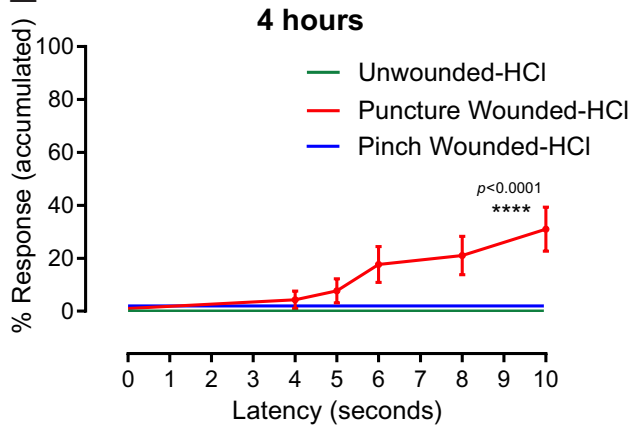**F****24 hours**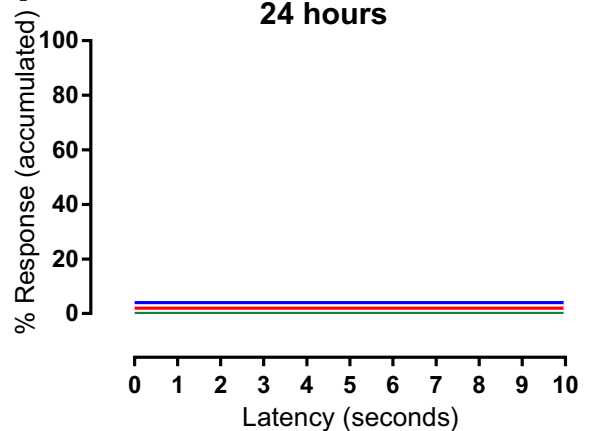

Supplement: rstb20190282supp5.pdf [file rstb20190282supp5.pdf]
